# Supplementary material
Source: PubMed Central journal article supplement (PMC3010395)
Supplement: NIHMS162604-supplement-01.pdf [file NIHMS162604-supplement-01.pdf]

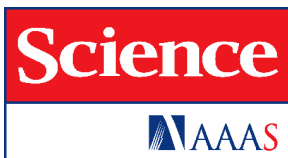

## Supporting Online Material for

### LIN-12/Notch Activation Leads to MicroRNA-Mediated Down-Regulation of Vav in *C. elegans*

Andrew S. Yoo and Iva Greenwald\*

\*To whom correspondence should be addressed.

E-mail: greenwald@cancercenter.columbia.edu

Published 20 October 2005 on *Science Express*

DOI: 10.1126/science.1119481

#### **This PDF file includes:**

Materials and Methods

SOM Text

Figs. S1 to S5

References and Notes

Yoo and Greenwald

## LIN-12/Notch activation leads to microRNA-mediated downregulation of Vav in *C. elegans*

### Supporting Online Material

#### I. Lateral signaling defect in *alg-1(RNAi)* hermaphrodites

Mutations that compromise the expression of the lateral signal without affecting the number of anchor cells cause P5.p, P6.p and P7.p to adopt a 3°-1°-3° pattern (1-4). *alg-1* is a gene required for microRNA maturation and post-transcriptional gene silencing (5). We noticed that *alg-1(RNAi)* hermaphrodites display a lateral signaling defect: P5.px and P7.px express the 3° marker *arIs101[K09H11.1p::yfp]* (Fig. S1). This observation suggested to us that a microRNA might be involved in lateral signaling.

'Feeding' RNAi was performed as in (6), using the *alg-1* cDNA clone X-6D15 inserted into the L4400 vector (7).

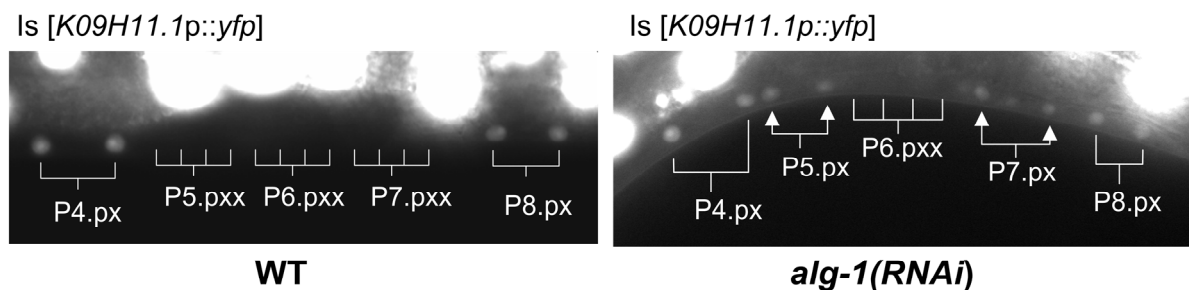

**Fig. S1. Lateral signaling defect in *alg-1(RNAi)* hermaphrodites.**

#### II. Identification of *mir* genes that are potential targets of lateral signal

We used the program CATS (8) to search a database of predicted *C. elegans* microRNA genes (9) for genes that contain two YRTGRGAA sequences (10, 11) within 500 bp. The criteria were chosen based on the arrangement of the LBS motifs in *lst-1*, a well-characterized

LIN-12 target gene (11). This analysis yielded only *mir-61*. Conserved LBSs are found in the *C. briggsae* homolog of *mir-61* (Fig. S2, S3).

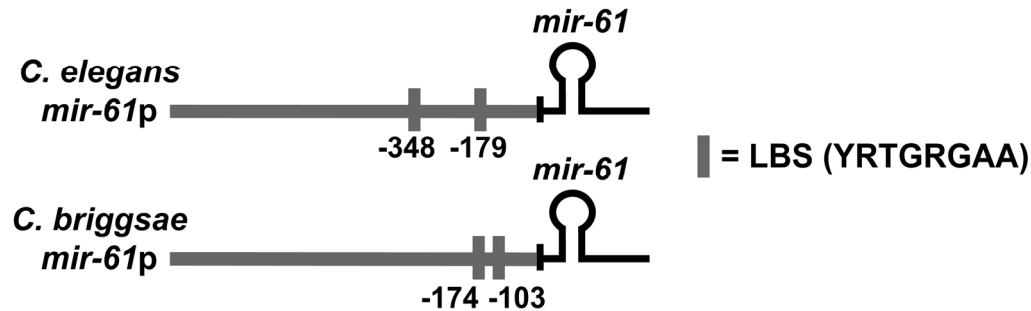

**Fig. S2. 5' flanking regions of *C. elegans* and *C. briggsae* *mir-61*.** The 5' flanking regions of *mir-61* in both species are predicted to be about 1 kb; the 5' flanking region is defined as the expanse from the next predicted gene to the start of the *mir-61* precursor. The positions of conserved LBSs are shown with respect to the start of the coding region for the *mir-61* precursor, symbolized by a hairpin.

*C. elegans mir-61* 5' UGACUAGAACCGUUACUCAUC 3'  
 |||||  
*C. briggsae mir-61* 5' UGACUAGAACCUUGACUCUGC 3'

**Fig. S3. Alignment of *C. elegans* and *C. briggsae* *mir-61*.**

### III. Identification of potential targets of *mir-61*

To identify potential target genes of *mir-61*, we searched for regions containing at least 7 bases of perfect complementarity to the 5' end (position 1-7 or 2-8) of *mir-61* in a database of *C. elegans* 3' UTRs collected from Ensmart: <http://www.ensembl.org/Multi/martview>, CEL version 140. For the genes without 3' UTR annotations, we took 1 kb of downstream flanking sequences. We then concentrated on the 3' UTRs of genes that have *C. briggsae* orthologs, and used CATS (8) to filter out those that did not match *mir-61* 5' region. This analysis resulted in a

set of 201 genes with seed matches present in the 3' UTRs of both *C. elegans* and *C. briggsae*. We used RNAhybrid (12) to identify which of these target sites are favorable based on the minimum free energy of the duplex, using -23 kcal/mol as our cutoff; when this threshold was lowered, we obtained candidates that did not have conservation beyond the first 7 nucleotides. Then, we considered the conservation of favorable target sites in both species. Using these criteria, three candidate genes were obtained, *vav-1*, *inx-1* and *egl-46* (Fig. S4).

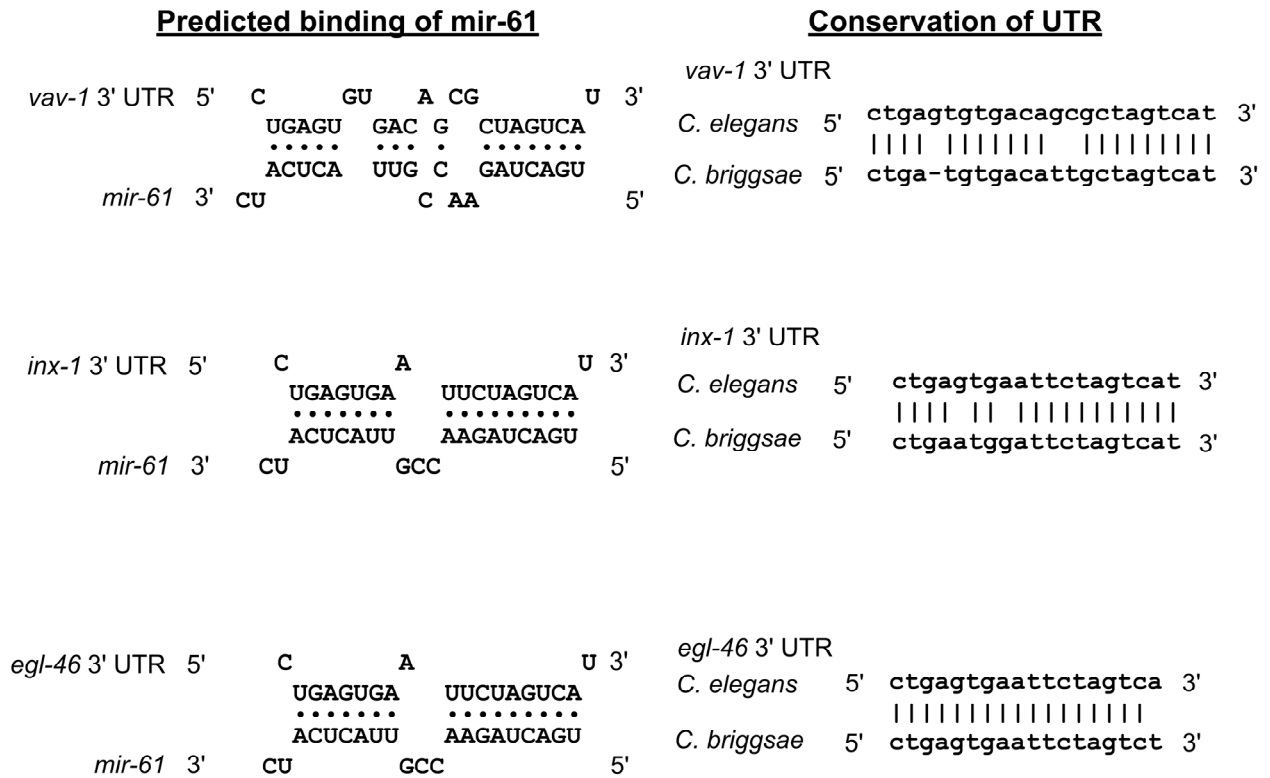

**Fig. S4. *mir-61* targets.** All were verified using the assay described in Fig. 3; however, only *vav-1* appears to be expressed in VPCs.

#### IV. Additional negative controls for the coelomocyte assay

In addition to the *unc-54* 3'UTR as a negative control, we tested two additional genes with 3' UTRs that have some resemblance to the *mir-61* target sequence, but did not appear likely to be bona fide targets based on lack of perfect complementarity or energetic considerations (Fig. S5). For *unc-68*, there is a wobble base pair (shaded in the alignment); in the coelomocyte assay, 0/44 individuals showed downregulation of the YFP signal. For *cdh-3*, there are two wobble base pairs and the minimal free energy (-18.7 kcal/mole) is not favorable; in the coelomocyte assay, 0/26 individuals showed downregulation of the YFP signal. These results support the view that expression of a microRNA in coelomocytes will cause downregulation only of bona fide target genes, and that perfect complementarity and favorable energetics are important for target gene selection.

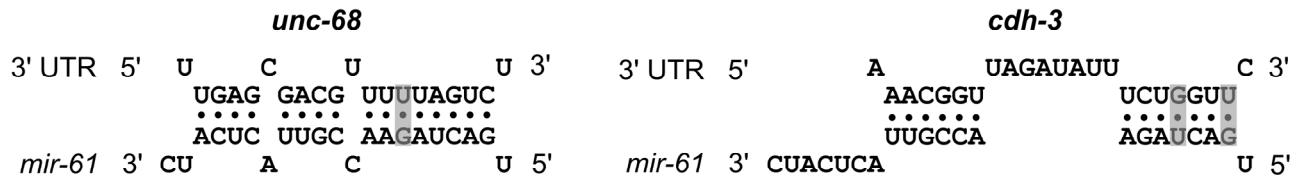

**Fig. S5. 3' UTRs that do not permit downregulation by *mir-61* in the coelomocyte assay. The *unc-54* 3'UTR also does not permit downregulation (see text and Fig. 3A).**

#### IV. List of transgenic strains used in this study.

For generating extrachromosomal arrays, the following cotransformation markers were used as described below: *pha-1(+)* (50 ng/μl) (13), *dpy-20 (+)* (50 ng/μl) (14), *ttx-3::gfp* (30 ng/μl) (15) or *ceh-22::gfp* (30 ng/μl) (16). YFP = yellow fluorescent protein. 2XNLS = two

copies of a nuclear localization sequence are present. Additional information about constructs is available upon request.

3° fate marker (50 ng/μl):

*pha-1(e2123); arIs101 [K09H11.1p::2xnls-yfp, pha-1(+)]*

*mir-61p* integrated reporter (50 ng/μl):

*pha-1(e2123); arIs107 [mir-61p::2xnls-yfp, pha-1(+), ttx-3::gfp]*

Mutated LBS (50 ng/μl):

*pha-1(e2123); arEx711 [mir-61p LBS mutated::2xnls-yfp, pha-1(+), ttx-3::gfp]*

*pha-1(e2123); arEx712 [mir-61p LBS mutated::2xnls-yfp, pha-1(+), ttx-3::gfp]*

*egl-17p::mir-61* (20 ng/μl) (mir-61 genomic region, F55A11 6807-6530)

*pha-1(e2123); nIs106; arEx713 [egl-17p::mir-61, pha-1(+), ceh-22::gfp]*

*pha-1(e2123); nIs106; arEx714 [egl-17p::mir-61, pha-1(+), ceh-22::gfp]*

*pha-1(e2123); nIs106; arEx715 [egl-17p::mir-61, pha-1(+), ceh-22::gfp]*

*pha-1(e2123); nIs106; arEx716 [egl-17p::mir-61, pha-1(+), ceh-22::gfp]*

*egl-17p::lsy-6* (20 ng/μl)

*pha-1(e2123); nIs106; arEx717 [egl-17p::lsy-6, pha-1(+), ttx-3::gfp]*

*pha-1(e2123); nIs106; arEx718 [egl-17p::lsy-6, pha-1(+), ttx-3::gfp]*

*pha-1(e2123); nIs106; arEx719 [egl-17p::lsy-6, pha-1(+), ttx-3::gfp]*

*vav-1* transcriptional reporter (5 ng/μl):

*pha-1(e2123); arEx720* [*vav-1p::2xnl5 yfp-unc-54 3' UTR, pha-1(+), ttx-3::gfp*]

*pha-1(e2123); arEx721* [*vav-1p::2xnl5 yfp-unc-54 3' UTR, pha-1(+), ttx-3::gfp*]

*pha-1(e2123); arEx722* [*vav-1p::2xnl5 yfp-unc-54 3' UTR, pha-1(+), ttx-3::gfp*]

*vav-1* sensor (5 ng/μl):

*pha-1(e2123); arEx723* [*vav-1p::2xnl5 yfp-vav-1 3' UTR, pha-1(+), ttx-3::gfp*]

*pha-1(e2123); arEx724* [*vav-1p::2xnl5 yfp-vav-1 3' UTR, pha-1(+), ttx-3::gfp*]

*pha-1(e2123); arEx725* [*vav-1p::2xnl5 yfp-vav-1 3' UTR, pha-1(+), ttx-3::gfp*]

*vav-1(mut)* sensor (5 ng/μl):

*pha-1(e2123); arEx726* [*vav-1p::2xnl5 yfp-vav-1(mutated) 3' UTR, pha-1(+), ttx-3::gfp*]

*pha-1(e2123); arEx727* [*vav-1p::2xnl5 yfp-vav-1(mutated) 3' UTR, pha-1(+), ttx-3::gfp*]

*pha-1(e2123); arEx728* [*vav-1p::2xnl5 yfp-vav-1(mutated) 3' UTR, pha-1(+), ttx-3::gfp*]

coelomocyte assay

Ex array 1 (microRNA-expressing) (20 ng/μl) (mir-61 genomic region, F55A11 6807-6415)

*dpy-20(e1282); arEx729* [*unc-122p::mir-61, dpy-20(+), ceh-22::gfp*]

Ex array 2 [neutral (20 ng/μl) + test 3' UTR (20 ng/μl)]:

*inx-1* test:

*dpy-20(e1282); arEx730* [*unc-122p::cfp-unc-54 UTR, hlh-8p::yfp-inx-1 UTR, ttx-3::gfp*]

*egl-46* test:

*dpy-20(e1282); arEx731 [unc-122p::cfp-unc-54 UTR, hlh-8p::yfp-egl-46 UTR, ttx-3::gfp]*

*vav-1* test:

*dpy-20(e1282); arEx732 [unc-122p::cfp-unc-54 UTR, hlh-8p::yfp-vav-1 UTR, ttx-3::gfp]*

*unc-54* test:

*dpy-20(e1282); arEx733 [unc-122p::cfp-unc-54 UTR, hlh-8p::yfp-unc-54 UTR, ttx-3::gfp]*

## V. *vav-1(RNAi)*

L4 hermaphrodites of genotype *lin-12(n379)* or *lin-12(n676)* were placed on plates containing bacteria with the following plasmid: *vav-1* cDNA amplified from yk1531d03 (17) inserted into the L4400 vector (6). F1 progeny were scored for the presence of pseudovulvae in the dissecting microscope.

1. N. Chen, I. Greenwald, *Dev Cell* **6**, 183 (Feb, 2004).
2. D. D. Shaye, I. Greenwald, *Development* **accepted** (2005).
3. N. Singh, M. Han, *Genes Dev* **9**, 2251 (Sep 15, 1995).
4. S. Tuck, I. Greenwald, *Genes Dev* **9**, 341 (Feb 1, 1995).
5. A. Grishok *et al.*, *Cell* **106**, 23 (Jul 13, 2001).
6. L. Timmons, A. Fire, *Nature* **395**, 854 (Oct 29, 1998).
7. R. S. Kamath *et al.*, *Nature* **421**, 231 (Jan 16, 2003).
8. H. Yu, A. S. Yoo, I. Greenwald, *Bioinformatics* **20**, 1198 (May 1, 2004).
9. S. Griffiths-Jones, *Nucleic Acids Res* **32**, D109 (Jan 1, 2004).
10. M. Rebeiz, N. L. Reeves, J. W. Posakony, *Proc Natl Acad Sci U S A* **99**, 9888 (Jul 23, 2002).
11. A. S. Yoo, C. Bais, I. Greenwald, *Science* **303**, 663 (Jan 30, 2004).
12. M. Rehmsmeier, P. Steffen, M. Hochsmann, R. Giegerich, *Rna* **10**, 1507 (Oct, 2004).
13. M. Granato, H. Schnabel, R. Schnabel, *Nucleic Acids Res* **22**, 1762 (May 11, 1994).
14. M. Han, P. W. Sternberg, *Genes Dev* **5**, 2188 (Dec, 1991).
15. O. Hobert, T. D'Alberti, Y. Liu, G. Ruvkun, *J Neurosci* **18**, 2084 (Mar 15, 1998).
16. P. G. Okkema, E. Ha, C. Haun, W. Chen, A. Fire, *Development* **124**, 3965 (Oct, 1997).
17. gift of Y. Kohara, National Institute of Genetics, Japan.
